# Supplementary material for: Ultrasonic Plasticizing and Pressing of High-Aspect Ratio Micropillar Arrays with Superhydrophobic and Superoleophilic Properties
Source: MDPI journal article supplement (doi:10.3390/pr12050856), 2024-04-24
Supplement: s1 [file s1]

## Supplementary Information

# Ultrasonic Plasticizing and Pressing of High-Aspect Ratio Micropillar Arrays with Superhydrophobic and Superoleophilic Properties

Shiyun Wu <sup>1</sup>, Jianjun Du <sup>1,\*</sup>, Shuqing Xu <sup>2</sup>, Jianguo Lei <sup>2</sup>, Jiang Ma <sup>2</sup> and Likuan Zhu <sup>2</sup>

<sup>1</sup> School of Mechanical Engineering and Automation, Harbin Institute of Technology (Shenzhen), Shenzhen 518055, China; wusy626@163.com

<sup>2</sup> College of Mechatronics and Control Engineering, Shenzhen University, Shenzhen 518061, China

\* Correspondence: jjdu@hit.edu.cn

### Supplementary Figure S1 and Notes

In order to compare the deformation and damage of the template microstructures after being used in UPP and the ultrasonic molding method of placing polymer pellets directly on the template microstructures and applying ultrasonic vibration to make the polymer pellets plasticize and fill the template micropores, two templates with different microstructures were designed and processed. One is a rectangular bar array with a height of 500  $\mu\text{m}$ , a width of 150  $\mu\text{m}$  and a pitch of 650  $\mu\text{m}$  (see Supplementary Figure S1a), which was obtained by low speed wire electrical discharge machining (WEDM-LS) 304 stainless steel plate. The other is a micropore (through-hole) array with a pore margin of about 30  $\mu\text{m}$  on the upper surface and a pore margin of about 75  $\mu\text{m}$  on the lower surface (see Supplementary Figure S1d), which was obtained by laser cutting 304 stainless steel sheet with a thickness of 0.5 mm. Supplementary Figures 1b and 1e show the above two templates after being used a certain number of times in the method of placing polymer pellets directly on the template microstructures, respectively, while Supplementary Figures 1c and 1f show the above two templates after being used the same number of times in UPP with the same process parameters, respectively. Obviously, deformation is present at multiple positions of the microstructure in Supplementary Figure S1b, while only individual positions in Supplementary Figure S1c. The microstructure in Supplementary Figure S1e is fractured, while in Supplementary Figure S1f is intact.

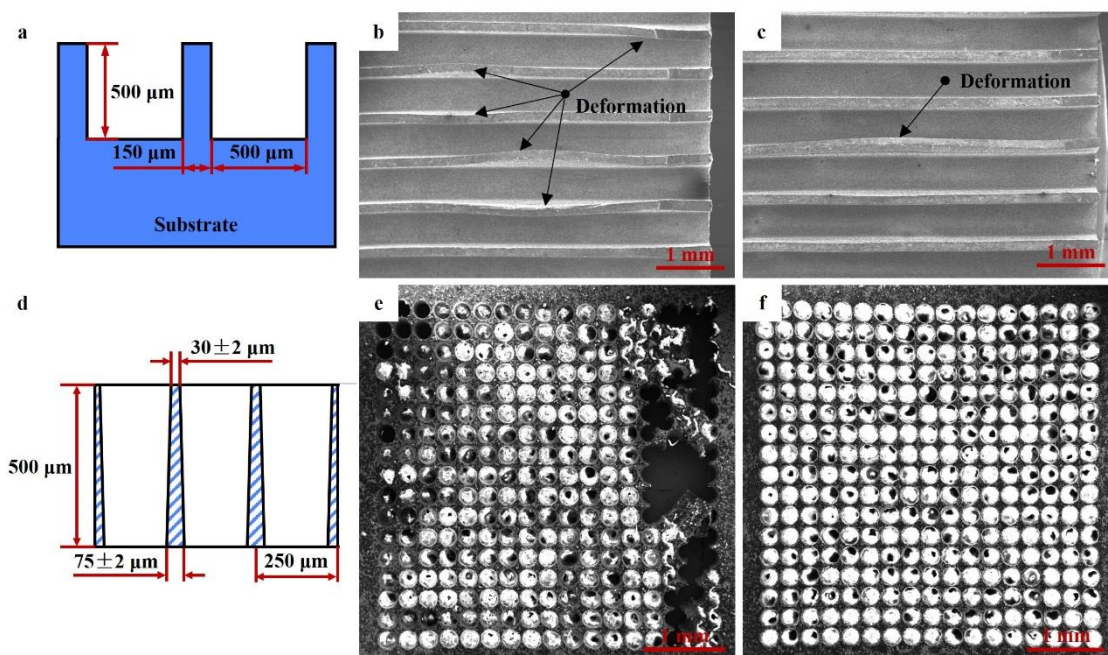

**Figure S1.** The deformation and damage of the template microstructures after being used. (a) The schematic dimensions of the rectangular bar array. (b) and (c) Rectangular bar array templates after being used in the method of placing polymer pellets directly on the template microstructures and UPP, respectively. (d) The schematic dimensions of the micropore (through-hole) array. (e) and (f) Micropore array templates after being used in the method of placing polymer pellets directly on the template microstructures and UPP, respectively.

**Table S1.** The previous work in preparing hierarchical micropillar arrays through the template methods and its results.

| NO.<br>and<br>mark                                                                   | Technique                                                                                             | Primary structure          |                 | Secondary structure        |                 | Steps and time                                                                                                                                                                                                                         | Forming<br>time | Preheating<br>temperature<br>of raw<br>material (°C) | Forming<br>environmental<br>requirement | Raw material                                      | Template material/type                                                                                                                                                         | Reference |
|--------------------------------------------------------------------------------------|-------------------------------------------------------------------------------------------------------|----------------------------|-----------------|----------------------------|-----------------|----------------------------------------------------------------------------------------------------------------------------------------------------------------------------------------------------------------------------------------|-----------------|------------------------------------------------------|-----------------------------------------|---------------------------------------------------|--------------------------------------------------------------------------------------------------------------------------------------------------------------------------------|-----------|
|                                                                                      |                                                                                                       | Width/<br>Diameter<br>(μm) | Aspect<br>ratio | Width/<br>Diameter<br>(nm) | Aspect<br>ratio |                                                                                                                                                                                                                                        |                 |                                                      |                                         |                                                   |                                                                                                                                                                                |           |
| 1.    | Nanoimprint<br>lithography                                                                            | 3                          | 4               | 200                        | 10              | Step1, Imprinting of micropillar array /Not reported.<br>Step2, Spin-coating of poly(sodium 4 styrenesulfonate (PSS) /30 s.<br>Step3, Second imprinting of fibrillar array /1000 s.<br>Step4, Dissolution of PSS / (Not calculated).   | >1030 s         | 170                                                  | Not reported                            | Polycarbonate (PC)                                | (i) Silicon (Primary structure).<br>(ii) Porous anode aluminum oxide (AAO) with a self-assembled monolayer of 1H,1H,2H,2H perfluorodecyltrichlorosilane (Secondary structure). | [45]      |
| 2.    | Photo-nanoimprinting                                                                                  | 2.6                        | 6.2             | 360                        | 1.2             | Step1, Photo-nanoimprinting / Not reported<br>Step2, Removal of the template / (Not calculated).                                                                                                                                       | Not reported    | Not reported                                         | Not reported                            | Polyethylene terephthalate (PET)                  | AAO with a release layer                                                                                                                                                       | [46]      |
| 3.    | Nanoimprinting<br>and Modified<br>laser swelling                                                      | 58                         | 0.5             | 500                        | 2.4             | Step1, Preparing the swelling polymer film /18.75 h (Not calculated).<br>Step2, Nanoimprinting of the secondary pillar structure /1.5 min.<br>Step3, Irradiating by the laser beam to form the primary structure /50 ms per structure. | >1.5 min        | Not reported                                         | Not reported                            | UV-curable polymer and methyl red (MR)-doped PMMA | (i) No template (Primary structure).<br>(ii) Polydimethylsiloxane (PDMS) (Secondary structure).                                                                                | [47]      |
| 4.  | Soft imprint<br>technique and<br>Directional<br>photofluidization<br>imprint<br>lithography<br>(DPIL) | 40                         | 1               | 500                        | 1.2             | Step1, Soft-imprinting of prestructured single-scale PDO 3 film /12 h.<br>Step2, DPIL of the secondary structure /0.33 h.                                                                                                              | 12.33 h         | Not reported                                         | In vacuum                               | Polydisperse orange 3 (PDO 3)                     | PDMS                                                                                                                                                                           | [48]      |

| NO.<br>and<br>mark | Technique                                                                                                                              | Primary structure          |                 | Secondary structure        |                 | Steps and time                                                                                                                                                                       | Forming<br>time | Preheating<br>temperature<br>of raw<br>material (°C) | Forming<br>environmental<br>requirement | Raw material                                                        | Template material/type                                                                                      | Reference |
|--------------------|----------------------------------------------------------------------------------------------------------------------------------------|----------------------------|-----------------|----------------------------|-----------------|--------------------------------------------------------------------------------------------------------------------------------------------------------------------------------------|-----------------|------------------------------------------------------|-----------------------------------------|---------------------------------------------------------------------|-------------------------------------------------------------------------------------------------------------|-----------|
|                    |                                                                                                                                        | Width/<br>Diameter<br>(μm) | Aspect<br>ratio | Width/<br>Diameter<br>(nm) | Aspect<br>ratio |                                                                                                                                                                                      |                 |                                                      |                                         |                                                                     |                                                                                                             |           |
| 5.                 |  Nanoimprinting                                         | 0.28                       | 21.4            | 110                        | 5.5             | Step1, Nanoimprinting of the hierarchical microstructures /20 min.<br>Step2, Cooling to room temperature and demolding of the polymeric structures / (Not calculated).               | 20 min          | 175                                                  | In vacuum                               | Polycarbonate (PC)                                                  | Multi-tiered branched porous anodic alumina (PAA)                                                           | [49]      |
| 6.                 |  Light-assisted soft molding                            | 50                         | 4               | 5                          | 2               | Poured the polymer mixture into the template and exposed in light to cure /14 h.                                                                                                     | 14 h            | 65                                                   | Vacuum of ~ 6×10 <sup>4</sup> Pa        | A mixture with 10:1 ratio of Sylgard 184 prepolymer and crosslinker | SU-8 photoresists                                                                                           | [50]      |
| 7.                 |  Capillary force lithography (CFL) and Photo-patterning | 50                         | 0.2             | 1000                       | 7.7             | Step1, CFL of pillar array (Secondary structure) /8 min.<br>Step2, Photo-patterning of micropillar array (Primary structure) /20 s.<br>Step3, Solvent developing / (Not calculated). | 8.3 min         | 95                                                   | Not reported                            | SU-8 photoresists                                                   | (i) PDMS (Secondary structure).<br>(ii) Photomask (Primary structure).                                      | [13]      |
| 8.                 |  UV-assisted micromolding and Capillary molding         | 50                         | 2               | 3000                       | 6.7             | Step1, UV-assisted micromolding of the primary structure / Not reported.<br>Step2, Capillary molding of the secondary structure /24 h.                                               | >24 h           | Room temperature                                     | In vacuum                               | Polyurethanes (PU)                                                  | (i) Liquid silicone rubber (HS-II, Dow Corning) (Primary structure).<br>(ii) Silicon (Secondary structure). | [51–53]   |
| 9.                 |  UV-assisted capillary molding                        | 30                         | 0.7             | 300                        | 16.7            | Step1, UV-assisted capillary molding of micro-nano hierarchical pillar arrays /15 min.<br>Step2, Baking on a hotplate at 100 °C for at least 15 min to dehydrate / (Not calculated). | 15 min          | Not reported                                         | A hotplate with 100 °C                  | UV-curable prepolymer                                               | PDMS                                                                                                        | [54]      |

| NO.<br>and<br>mark                                                                    | Technique                                         | Primary structure          |                 | Secondary structure        |                 | Steps and time                                                                                                                                                                                                                                  | Forming<br>time | Preheating<br>temperature<br>of raw<br>material (°C) | Forming<br>environmental<br>requirement | Raw material                                             | Template material/type                                                                     | Reference |
|---------------------------------------------------------------------------------------|---------------------------------------------------|----------------------------|-----------------|----------------------------|-----------------|-------------------------------------------------------------------------------------------------------------------------------------------------------------------------------------------------------------------------------------------------|-----------------|------------------------------------------------------|-----------------------------------------|----------------------------------------------------------|--------------------------------------------------------------------------------------------|-----------|
|                                                                                       |                                                   | Width/<br>Diameter<br>(μm) | Aspect<br>ratio | Width/<br>Diameter<br>(nm) | Aspect<br>ratio |                                                                                                                                                                                                                                                 |                 |                                                      |                                         |                                                          |                                                                                            |           |
| 10.    | 2-step UV<br>assisted capillary<br>molding        | 5                          | 5               | 475                        | 5.9             | Step1, Spin-coating of PUA on the flexible PET substrate (Not calculated).<br>Step2, UV-assisted capillary molding of the microhairs /50 s.<br>Step3, Second UV-assisted capillary molding of nanohairs on the preformed microhairs /10 s.      | 60 s            | Not reported                                         | Not reported                            | Soft UV-<br>curable<br>polyurethane<br>acrylate<br>(PUA) | (i) PDMS (Primary<br>structure).<br>(ii) PUA (Secondary<br>structure).                     | [55]      |
| 11.    | Thermal-assisted<br>capillary molding             | 0.38                       | 2.4             | 100                        | 1.8             | Step1, Capillary molding of hierarchical PS nanohairs /3 h.<br>Step2, Removal of the AAO template / (Not<br>calculated).                                                                                                                        | 3 h             | 185                                                  | In vacuum                               | Polystyrene<br>(PS)                                      | AAO                                                                                        | [56]      |
| 12.    | Infiltration<br>forming<br>(Capillary<br>molding) | 10                         | 7               | 60                         | 8.3             | Step1, Spin-coating of low-viscosity polymeric solutions (10 wt% PMMA) on the top surface of the template /30 s.<br>Step2, Capillary molding of the hierarchical microstructures /1 h.<br>Step3, Dissolving the template / (Not<br>calculated). | 60.5 min        | 120                                                  | Not reported                            | Low-viscosity<br>polymeric<br>solutions (10<br>wt% PMMA) | A bonded template of the<br>micro- and nanoporous<br>alumina membranes                     | [57]      |
| 13.  | Soft molding                                      | 20                         | 3               | 7000                       | 2.9             | Poured PU onto the PDMS mold and allowed it to cure at 75 °C for 72 h /72 h.                                                                                                                                                                    | 72 h            | 75                                                   | Not reported                            | Polyurethane<br>(PU)                                     | PDMS                                                                                       | [58]      |
| 14.  | Nanomolding                                       | 5                          | 2               | 600                        | 9               | Step1, Molding the liquid polymer under vacuum /4 h.<br>Step2, Etching away the both membrane /<br>(Not calculated).                                                                                                                            | 4 h             | 65                                                   | In vacuum                               | PDMS                                                     | A membrane with self-<br>organized high aspect ratio<br>polycarbonate micro/nano-<br>pores | [59]      |
| 15.  | Hot-embossing                                     | 15                         | 2               | 100                        | 11              | Hot-embossing and demolding /10 min.                                                                                                                                                                                                            | 10 min          | 150                                                  | Vacuum of 1 Pa                          | Thermoplastic<br>COP polymer<br>(Zeonor 1060R)           | Solvay MD700 UV cured<br>polymer                                                           | [60]      |

| NO.<br>and<br>mark                                                                    | Technique                            | Primary structure          |                 | Secondary structure        |                 | Steps and time                                                                                                                                                     | Forming<br>time | Preheating<br>temperature<br>of raw<br>material (°C) | Forming<br>environmental<br>requirement | Raw material       | Template material/type                                                                            | Reference |
|---------------------------------------------------------------------------------------|--------------------------------------|----------------------------|-----------------|----------------------------|-----------------|--------------------------------------------------------------------------------------------------------------------------------------------------------------------|-----------------|------------------------------------------------------|-----------------------------------------|--------------------|---------------------------------------------------------------------------------------------------|-----------|
|                                                                                       |                                      | Width/<br>Diameter<br>(μm) | Aspect<br>ratio | Width/<br>Diameter<br>(nm) | Aspect<br>ratio |                                                                                                                                                                    |                 |                                                      |                                         |                    |                                                                                                   |           |
| 16.    | Hot-pressing                         | 5                          | 3.5             | 600                        | 8               | Step1, Melting the PP and filling the pores in the membrane /40-50 min.<br>Step2, Etching the membranes to realize the polypropylene fibers /1 h (Not calculated). | 40-50 min       | 200                                                  | Not reported                            | polypropylene (PP) | Polycarbonate (PC)                                                                                | [61]      |
| 17.    | Injection molding                    | 18.5                       | 1               | 50                         | 10              | Injection molding /Not reported.                                                                                                                                   | Not reported    | 255                                                  | Mold temperature 50 °C                  | Polypropylene (PP) | (i) Aluminum (Primary structure).<br>(ii) AAO (Secondary structure).                              | [62]      |
| 18.    | Injection molding                    | 40                         | 2               | 50                         | 2.5             | Injection molding /Not reported.                                                                                                                                   | Not reported    | 255                                                  | Mold temperature 70 °C                  | Polypropylene (PP) | (i) Aluminum (Primary structure).<br>(ii) AAO (Secondary structure).                              | [63]      |
| 19.    | Injection molding                    | 200                        | 1.5             | 400                        | 12              | Injection molding /95 s                                                                                                                                            | 95 s            | Not reported                                         | Mold temperature 178 °C                 | Polypropylene (PP) | (i) Etched plate (Primary structure).<br>(ii) AAO with anti-sticking layer (Secondary structure). | [64]      |
| 20.    | Ultrasonic forming                   | 20.9                       | 1.2             | 600                        | 1.3             | Ultrasonic forming of the hierarchical microstructures /9 s.                                                                                                       | 9 s             | Room temperature                                     | None                                    | Polyethylene (PE)  | Nickel nano-micro mold                                                                            | [23]      |
| 21.  | Ultrasonic plasticizing and pressing | 48.5                       | 4.1             | 250                        | 20              | Step1, Ultrasonic plasticizing and pressing /5.3 s.<br>Step2, Removal of residual template /10 min (Not calculated).                                               | 5.3 s           | Room temperature                                     | None                                    | Polypropylene (PP) | (i) 304 stainless steel (Primary structure).<br>(ii) AAO (Secondary structure).                   | This work |

Note: The forming time in the table does not include the heating and cooling time of the mold, the heating time of raw materials, and the process time that can process a large number of workpieces simultaneously.
